# Supplementary material for: The effects of age on skeletal muscle and the phosphocreatine energy system: can creatine supplementation help older adults
Source: Springer Nature journal article supplement (doi:10.1186/1476-5918-8-6), 2009-12-01
Supplement: Additional file 2 [file 1476-5918-8-6-s2.pdf]

**Table 4.** Creatine supplementation does not enhance performance in older adults

| <b>Author</b>            | <b>Training and Familiarization Protocol</b>                                                   | <b>Study Design and Supplement Protocol</b>                                                                                                                       | <b>Significant Results</b>                                                                                                                                                                                           |
|--------------------------|------------------------------------------------------------------------------------------------|-------------------------------------------------------------------------------------------------------------------------------------------------------------------|----------------------------------------------------------------------------------------------------------------------------------------------------------------------------------------------------------------------|
| Rawson et al., 1999 [16] | No training.                                                                                   | <i>Double-blind, placebo controlled, randomized design.</i> Supplemented 20 males with Cr or PLA at a dose of 20 g/day for 10 days followed by 4 g/d for 20 days. | ↔ strength of elbow flexors with Cr                                                                                                                                                                                  |
|                          | Testing occurred at baseline and following 10 and 30 days of supplementation.                  |                                                                                                                                                                   | ↔ body mass, body density or fat-free mass with Cr<br><br>↑ performance in leg fatigue task with Cr                                                                                                                  |
| Rawson et al., 2000 [21] | No training.                                                                                   | <i>Double-blind, placebo controlled, randomized design.</i> Supplemented 17 males with 20 g of Cr and 4 g of sucrose (Cr) or 24 g of sucrose (PLA) for 5 days.    | ↔ isometric strength of elbow flexors with Cr                                                                                                                                                                        |
|                          |                                                                                                |                                                                                                                                                                   | ↑ isokinetic knee extension with Cr, but authors concluded not meaningful<br><br>↑ body mass with Cr                                                                                                                 |
| Jakobi et al., 2001 [54] | No training.                                                                                   | <i>Placebo controlled, randomized design.</i> Supplemented 12 men with either Cr and maltodextrin (20 g/d of each) or a PLA (20 g/d of maltodextrin).             | ↔ MVC or muscle activation with Cr                                                                                                                                                                                   |
|                          | Testing consisted of a familiarization protocol followed by baseline testing and post-testing. |                                                                                                                                                                   | ↔ time to fatigue, decline in MVC, muscle activation or contractile properties with Cr<br><br>↔ rate of recovery, voluntary force or stimulated contractile force during recovery with Cr<br><br>↔ body mass with Cr |

|                             |                                                                                                                                                                                                                                |                                                                                                                                                                                                                              |                                                                                                                                                                                 |
|-----------------------------|--------------------------------------------------------------------------------------------------------------------------------------------------------------------------------------------------------------------------------|------------------------------------------------------------------------------------------------------------------------------------------------------------------------------------------------------------------------------|---------------------------------------------------------------------------------------------------------------------------------------------------------------------------------|
| Berman et al.,<br>1998 [23] | Following four familiarization sessions a whole body resistance training program was initiated that involved lifting 3 days per week for 7 weeks. Testing was conducted at baseline and following 7 weeks of training.         | <i>Double-blind, placebo controlled, randomized design with 32 men and women.</i> Four groups: Cr-control, PLA-control, Cr-exercise, PLA-exercise. Supplemented with Cr or PLA at 20 g/day for 5 days and 3 g/d for 47 days. | ↔ body mass, body fat or lower limb muscle volume with Cr<br><br>↔ 1 and 12 RM and isometric intermittent endurance tests for bench press, leg press and leg extension with Cr. |
| Eijnde et al.,<br>2003 [20] | Training consisted of 24 minutes of endurance training and a whole body resistance training program. Testing was conducted at baseline, 6 months following training and 1 year post-training in a subgroup of 20 participants. | <i>Double-blind, placebo controlled, randomized design.</i> Supplemented 46 men with either Cr or PLA at a dose of 5 g/d for 6 months.                                                                                       | ↔ maximal isometric strength with Cr<br><br>↔ Body mass with Cr<br><br>↑ total creatine in Cr group after 6 months                                                              |

↑,↓,↔ Signifies increase, decrease, or no change compared to a control/placebo condition  
Cr: creatine, PLA: placebo, RM: repetition maximum, MVC: maximal isometric voluntary force
